# Supplementary material for: Transcriptomic profiling of neonatal mouse granulosa cells reveals new insights into primordial follicle activation
Source: PubMed Central journal article supplement — Biol Reprod. 2021 Oct 21;106(3):503–14. doi: 10.1093/biolre/ioab193 (PMC8934697; doi:10.1093/biolre/ioab193), 2021-10-21
Supplement: s4_ioab193.pdf [file s4_ioab193.pdf]

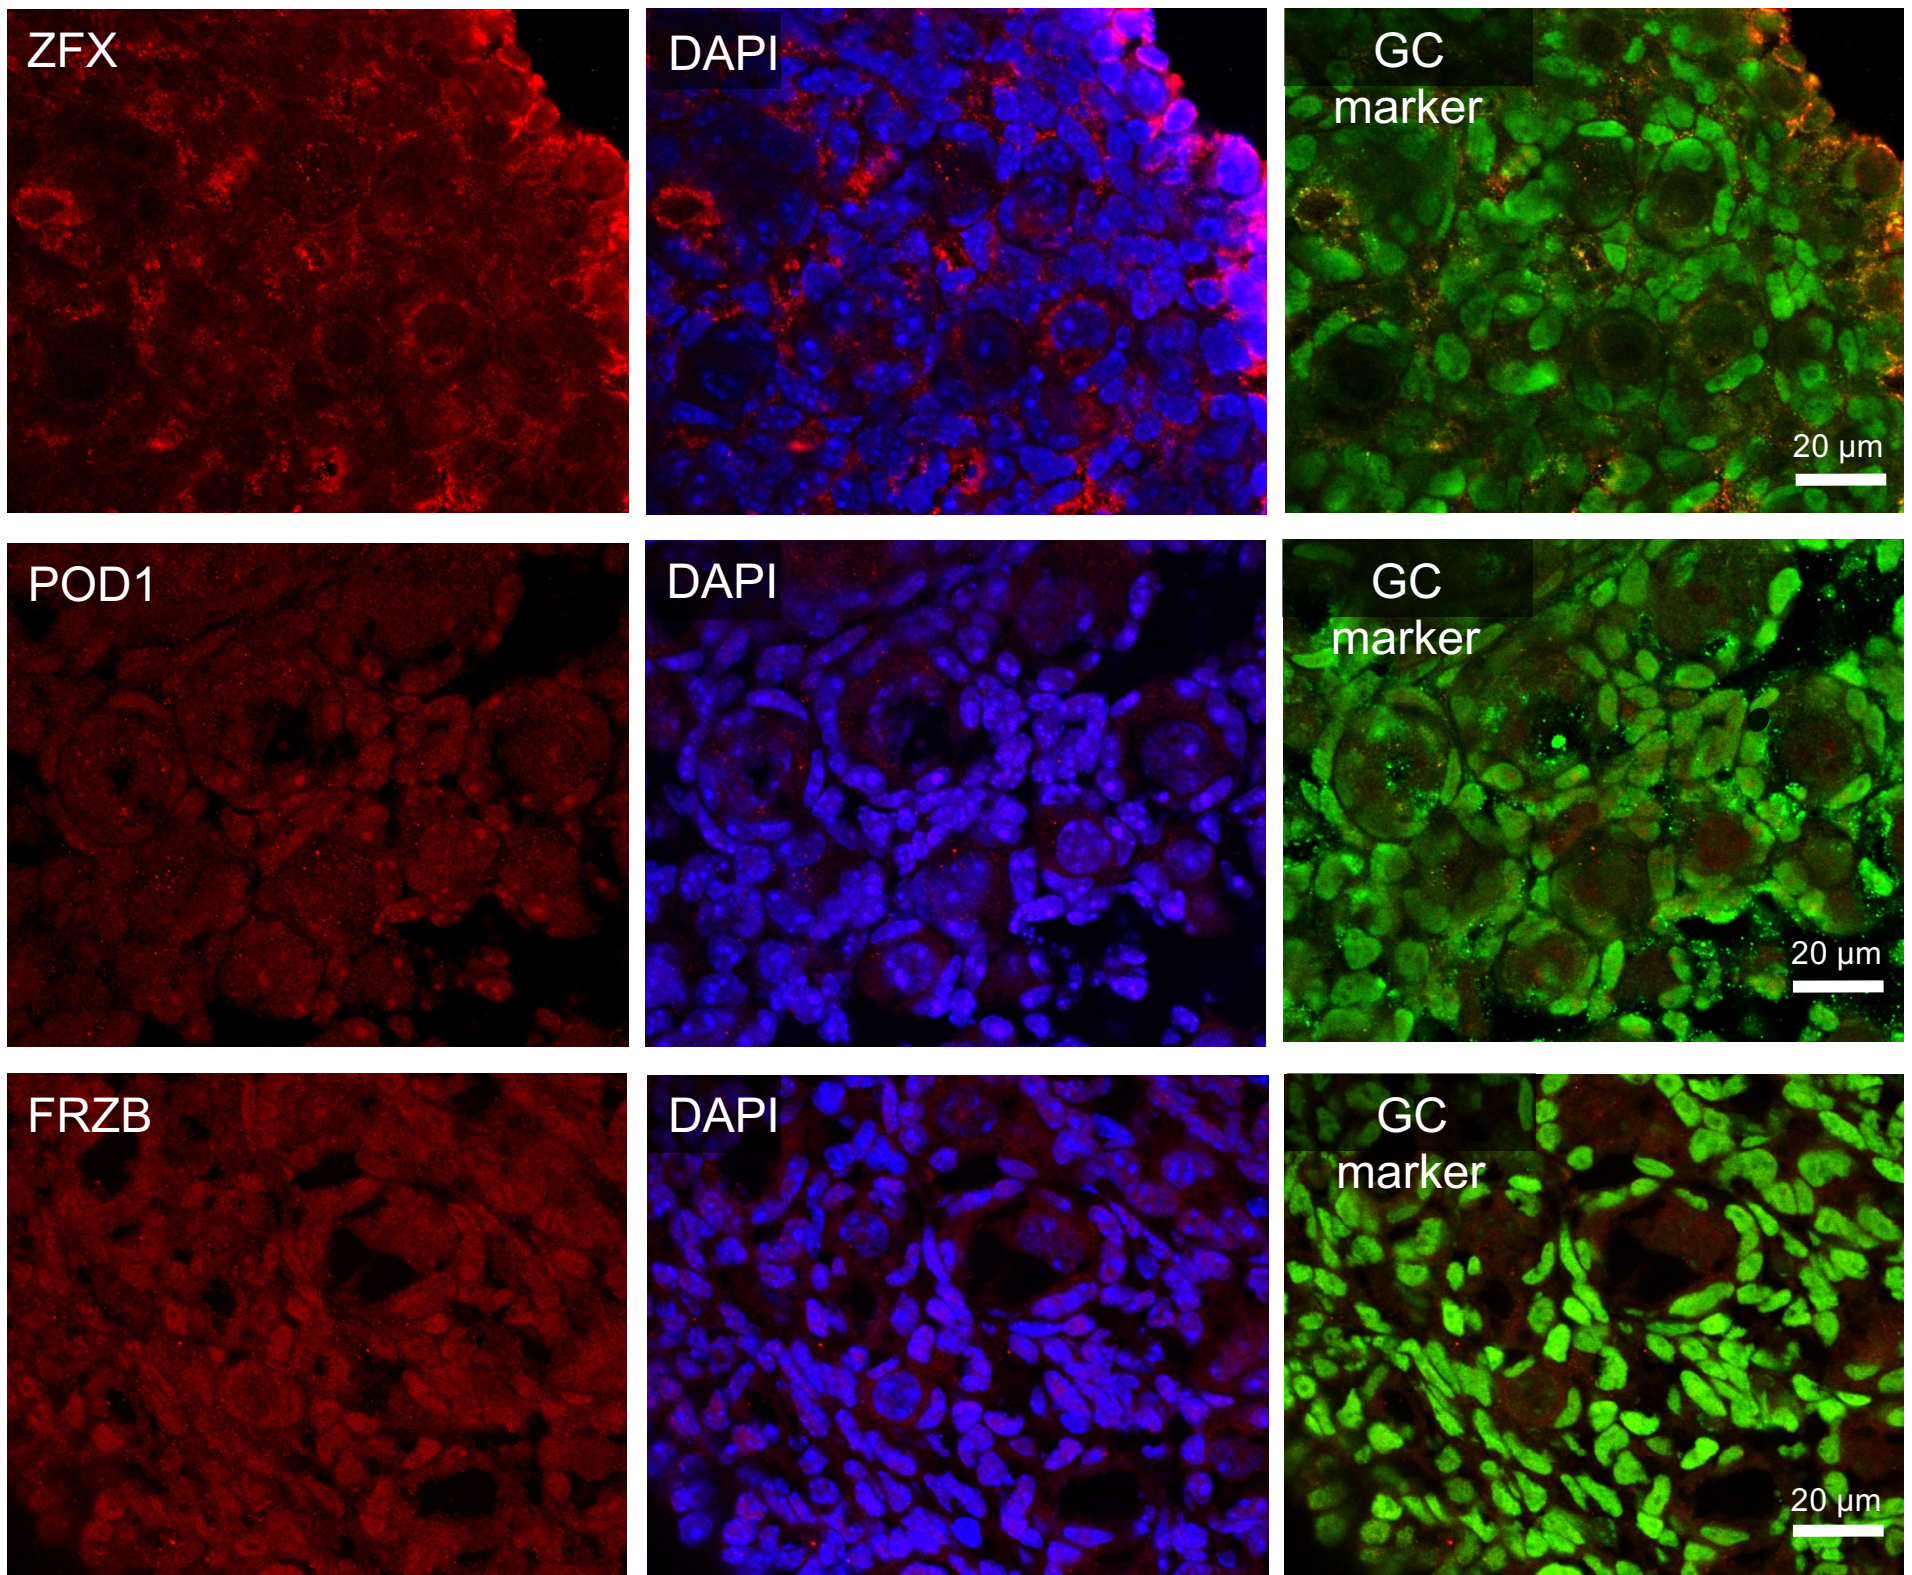

**S4: Full images from data in Figure 5 showing the expression and localisation of proteins of interest within the PND4 ovary. Images featured in figure5 were cropped and zoomed for presentation in the manuscript, and their full size is presented.**
