# Supplementary material for: Transcriptomic profiling of neonatal mouse granulosa cells reveals new insights into primordial follicle activation
Source: PubMed Central journal article supplement — Biol Reprod. 2021 Oct 21;106(3):503–14. doi: 10.1093/biolre/ioab193 (PMC8934697; doi:10.1093/biolre/ioab193), 2021-10-21
Supplement: s5_ioab193.pdf [file s5_ioab193.pdf]

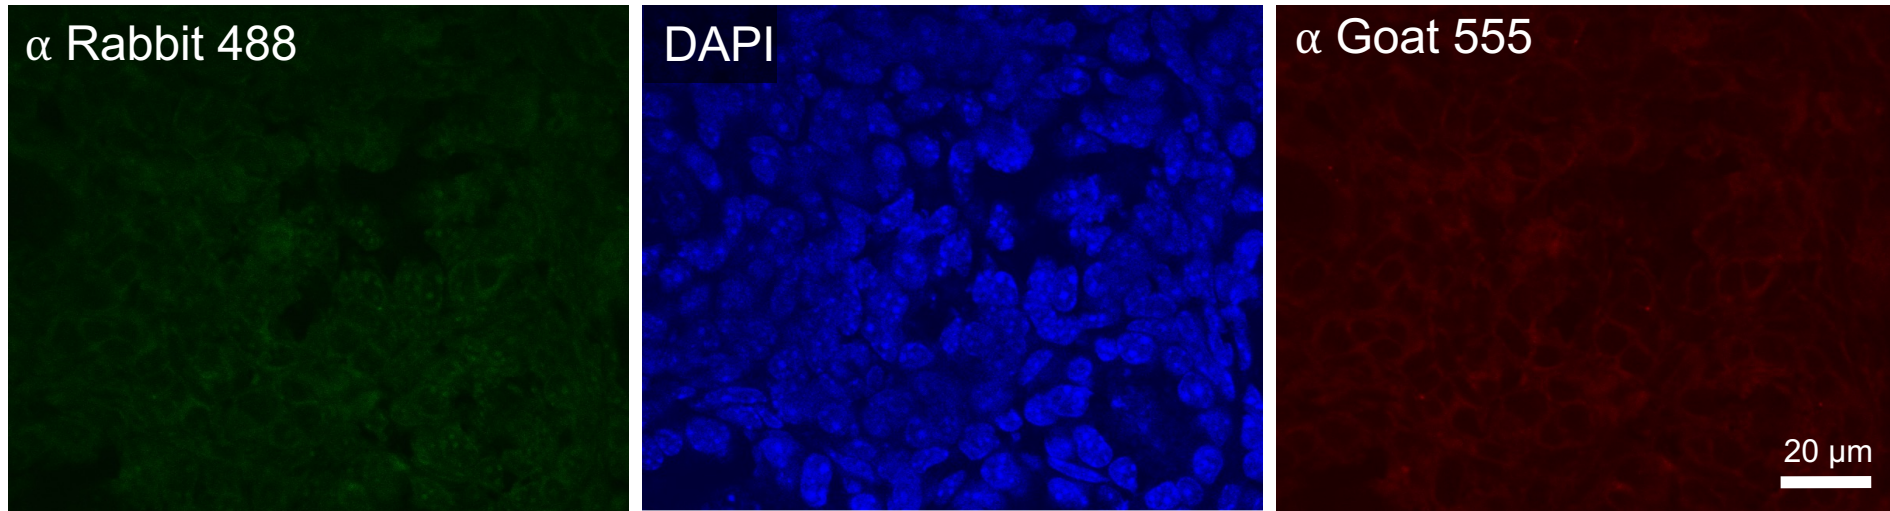

**S5: Secondary only antibody controls for localisation of proteins of interest within the PND4 ovary.** Images featured in figure 5 were pseudocoloured, so all protein of interest were red, and all granulosa cell markers were green, but secondary antibodies of a donkey  $\alpha$  rabbit AlexaFluor 488 and donkey  $\alpha$  goat AlexaFluor 555 were utilised. Scale bar represents 20  $\mu$ m.
