# Supplementary material for: Transcriptomic profiling of neonatal mouse granulosa cells reveals new insights into primordial follicle activation
Source: PubMed Central journal article supplement — Biol Reprod. 2021 Oct 21;106(3):503–14. doi: 10.1093/biolre/ioab193 (PMC8934697; doi:10.1093/biolre/ioab193), 2021-10-21
Supplement: s6_ioab193.pdf [file s6_ioab193.pdf]

**A**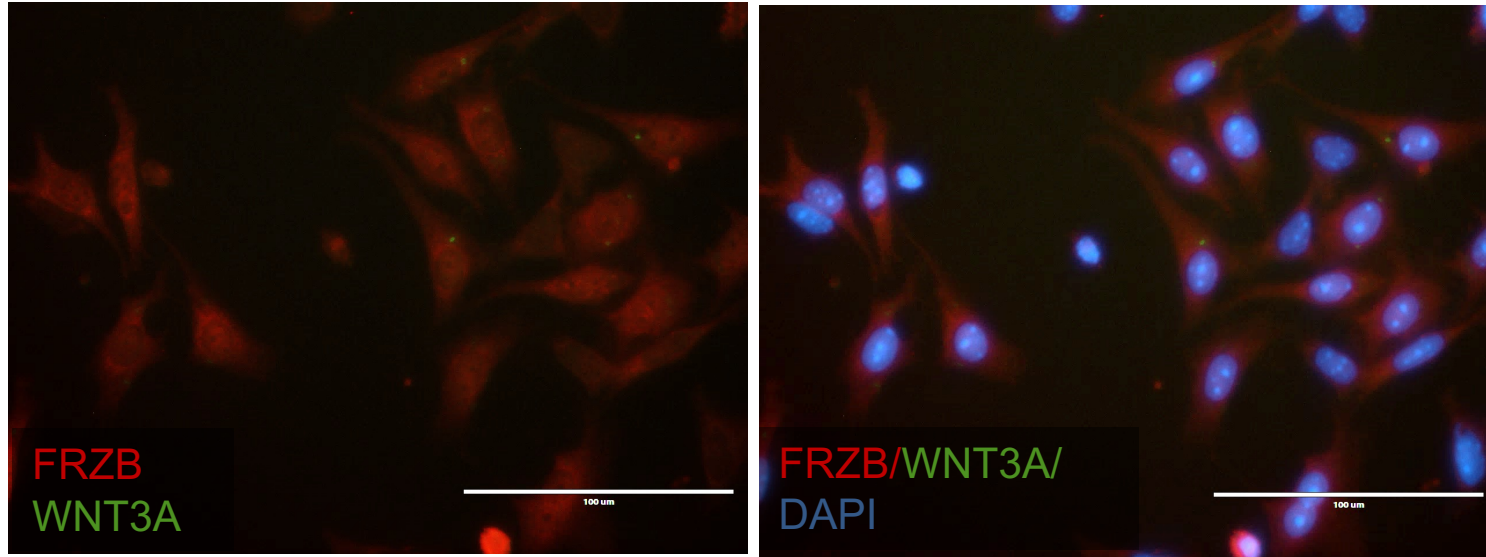**B**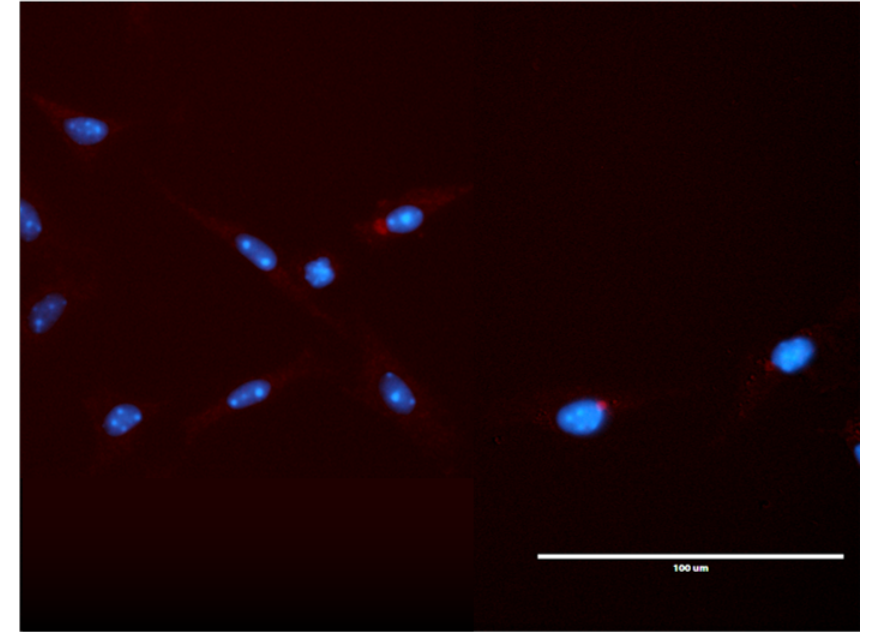

**S6: Full images from data in Figure 6 showing the total expression and localisation of proteins of interest within the PND4 ovary.** Images featured in figure 6 were cropped and zoomed for presentation in the manuscript. (A) uncropped images of the localisation of FRZB and WNT3A in granulosa cells, (B) duolink proximity ligation assay image uncropped. Scale bars represent 100 µm.
